# Supplementary material for: Silica nanowires synthesized from gas by-product of SiC synthesis from alkoxide precursors
Source: Royal Society of Chemistry journal article supplement (doi:10.1039/c2ce25499a), 2012-01-01
Supplement: c2ce25499a.pdf [file c2ce25499a.pdf]

## SUPPLEMENTARY INFORMATION

### Silica nanowires synthesized from gas by-product of SiC synthesis from alkoxide precursors

Yoo Youl Choi,<sup>†</sup> Sijung Park,<sup>†</sup> Younghee Kim,<sup>††</sup> Doojin Choi<sup>\*,†</sup>

<sup>†</sup>Department of Materials Science and Engineering, Yonsei University, 262 Seongsanno,  
Sudaemun-Gu, Seoul, 120-749, Republic of Korea

<sup>††</sup>Energy Materials Center, Korea Institute of Ceramic Engineering and Technology,  
Seoul, Republic of Korea

\*Corresponding author. E-mail: drchoidj@yonsei.ac.kr

Tel: +82-2-2123-2852, Fax: +82-2-365-5882

| T (°C) | 2SiO(g) = SiO <sub>2</sub> + Si |          | SiO(g) + CO(g) = SiO <sub>2</sub> + C |          | 2SiO(g) + O <sub>2</sub> (g) = 2SiO <sub>2</sub> |          |
|--------|---------------------------------|----------|---------------------------------------|----------|--------------------------------------------------|----------|
|        | ΔG (kcal)                       | K        | ΔG (kcal)                             | K        | ΔG (kcal)                                        | K        |
| 1200   | -46.20                          | 7.15E+06 | -42.86                                | 2.29E+06 | -201.29                                          | 7.33E+29 |
| 1180   | -47.76                          | 1.53E+07 | -44.46                                | 4.87E+06 | -203.67                                          | 4.30E+30 |
| 1160   | -49.33                          | 3.33E+07 | -46.06                                | 1.06E+07 | -206.05                                          | 2.65E+31 |
| 1140   | -50.90                          | 7.45E+07 | -47.67                                | 2.36E+07 | -208.43                                          | 1.73E+32 |
| 1120   | -52.47                          | 1.70E+08 | -49.27                                | 5.37E+07 | -210.81                                          | 1.19E+33 |
| 1100   | -54.04                          | 3.99E+08 | -50.88                                | 1.25E+08 | -213.20                                          | 8.62E+33 |
| 1080   | -55.61                          | 9.61E+08 | -52.49                                | 3.01E+08 | -215.59                                          | 6.66E+34 |
| 1060   | -57.19                          | 2.37E+09 | -54.10                                | 7.40E+08 | -217.98                                          | 5.47E+35 |
| 1040   | -58.76                          | 6.04E+09 | -55.71                                | 1.87E+09 | -220.38                                          | 4.79E+36 |
| 1020   | -60.34                          | 1.58E+10 | -57.32                                | 4.88E+09 | -222.77                                          | 4.50E+37 |
| 1000   | -61.92                          | 4.27E+10 | -58.94                                | 1.31E+10 | -225.17                                          | 4.53E+38 |
| 980    | -63.51                          | 1.19E+11 | -60.56                                | 3.65E+10 | -227.57                                          | 4.92E+39 |
| 960    | -65.09                          | 3.45E+11 | -62.18                                | 1.05E+11 | -229.98                                          | 5.79E+40 |
| 940    | -66.68                          | 1.03E+12 | -63.80                                | 3.12E+11 | -232.39                                          | 7.38E+41 |
| 920    | -68.27                          | 3.21E+12 | -65.42                                | 9.63E+11 | -234.80                                          | 1.03E+43 |
| 900    | -69.86                          | 1.04E+13 | -67.04                                | 3.10E+12 | -237.21                                          | 1.56E+44 |
| 880    | -71.45                          | 3.49E+13 | -68.67                                | 1.04E+13 | -239.63                                          | 2.62E+45 |
| 860    | -73.05                          | 1.23E+14 | -70.30                                | 3.63E+13 | -242.04                                          | 4.86E+46 |
| 840    | -74.65                          | 4.54E+14 | -71.93                                | 1.33E+14 | -244.47                                          | 1.00E+48 |
| 820    | -76.25                          | 1.76E+15 | -73.56                                | 5.11E+14 | -246.89                                          | 2.31E+49 |
| 800    | -77.85                          | 7.18E+15 | -75.20                                | 2.07E+15 | -249.32                                          | 6.02E+50 |

**Table S1.** Calculated Gibbs free energies and equilibrium constants as a function of temperature for chemical reactions that can produce SiO<sub>2</sub> from SiO(g).
